# Supplementary material for: Cross-sectional associations of different types of nature exposure with psychotropic, antihypertensive and asthma medication
Source: HighWire-hosted journal article supplement (doi:10.1136/oemed-2022-108491), 2023-01-16
Supplement: oemed-2022-108491supp001_data_supplement.pdf [file oemed-2022-108491supp001_data_supplement.pdf]

## Supplemental material

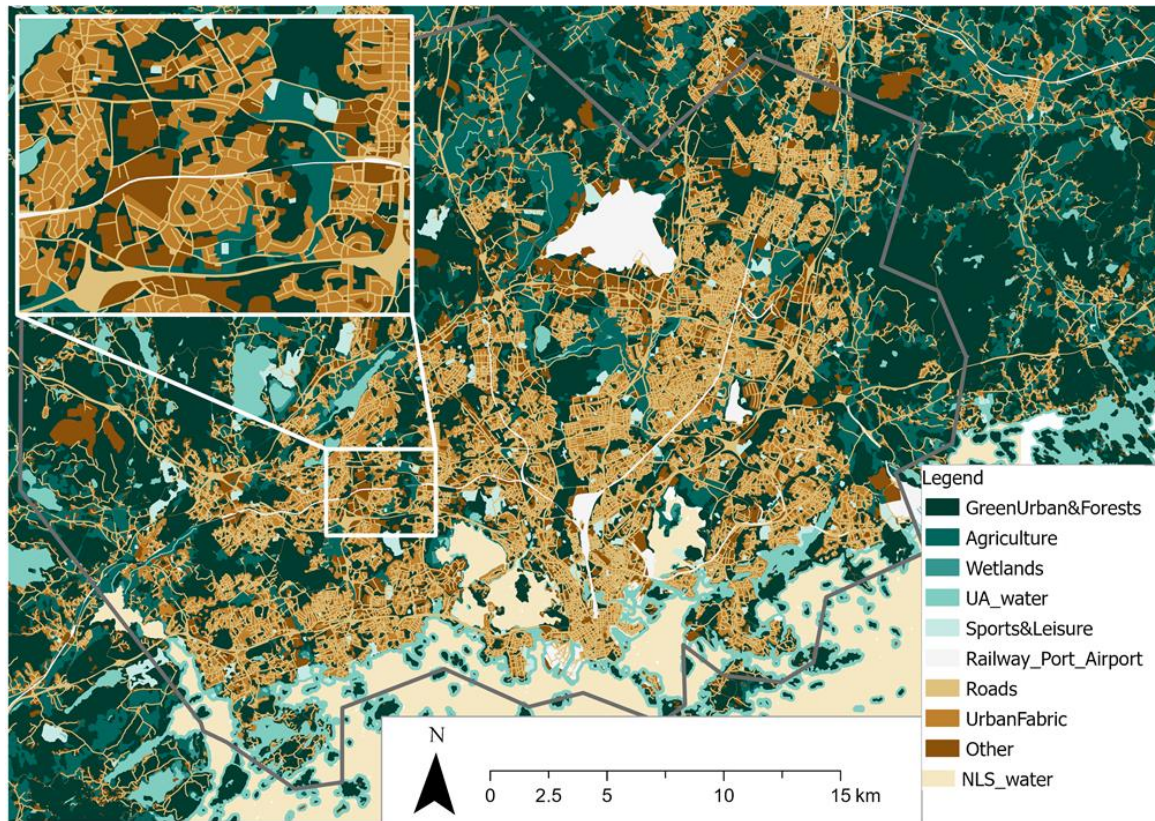

Supplemental Figure S1. Area covering the 1 km buffers for all questionnaire respondents (address available for  $n=7,316$ ) on top of a modified Urban Atlas map. Contains data from the Urban Atlas 2012 (European Union, Copernicus Land Monitoring Service 2012, European Environment Agency (EEA)) and the National Land Survey of Finland Topographic Database 12/2015 (water areas that are not included in the Urban Atlas 2012).

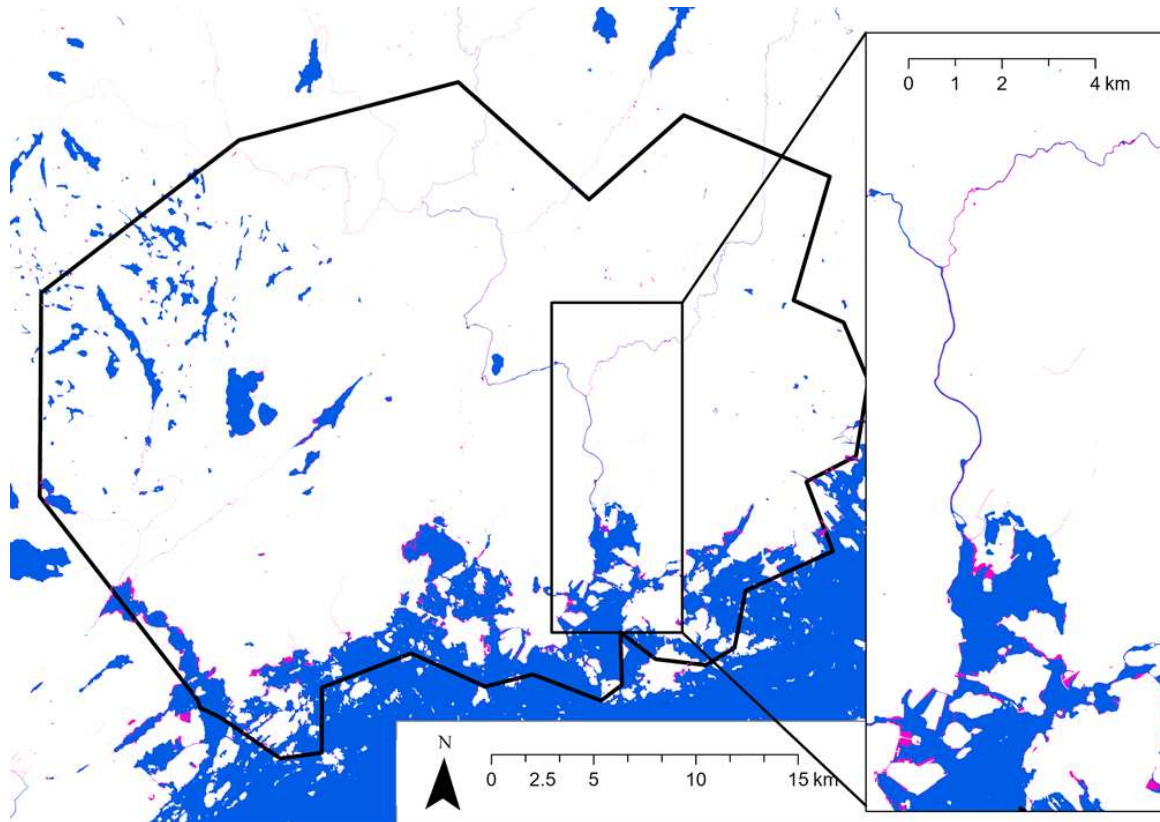

Supplemental Figure S2. Comparison between the calculated water class and water from the topographic database (11/2018) of National Land Survey of Finland in the area covering the 1 km buffers around the homes (black line). Pink areas are classified in other classes than water in the Urban Atlas 2012. Visual inspection of satellite images reveals that most of these areas are not open water, but wetlands. Contains data from the Urban Atlas 2012 (European Union, Copernicus Land Monitoring Service 2012, European Environment Agency (EEA)) and the National Land Survey of Finland Topographic Database 12/2015.

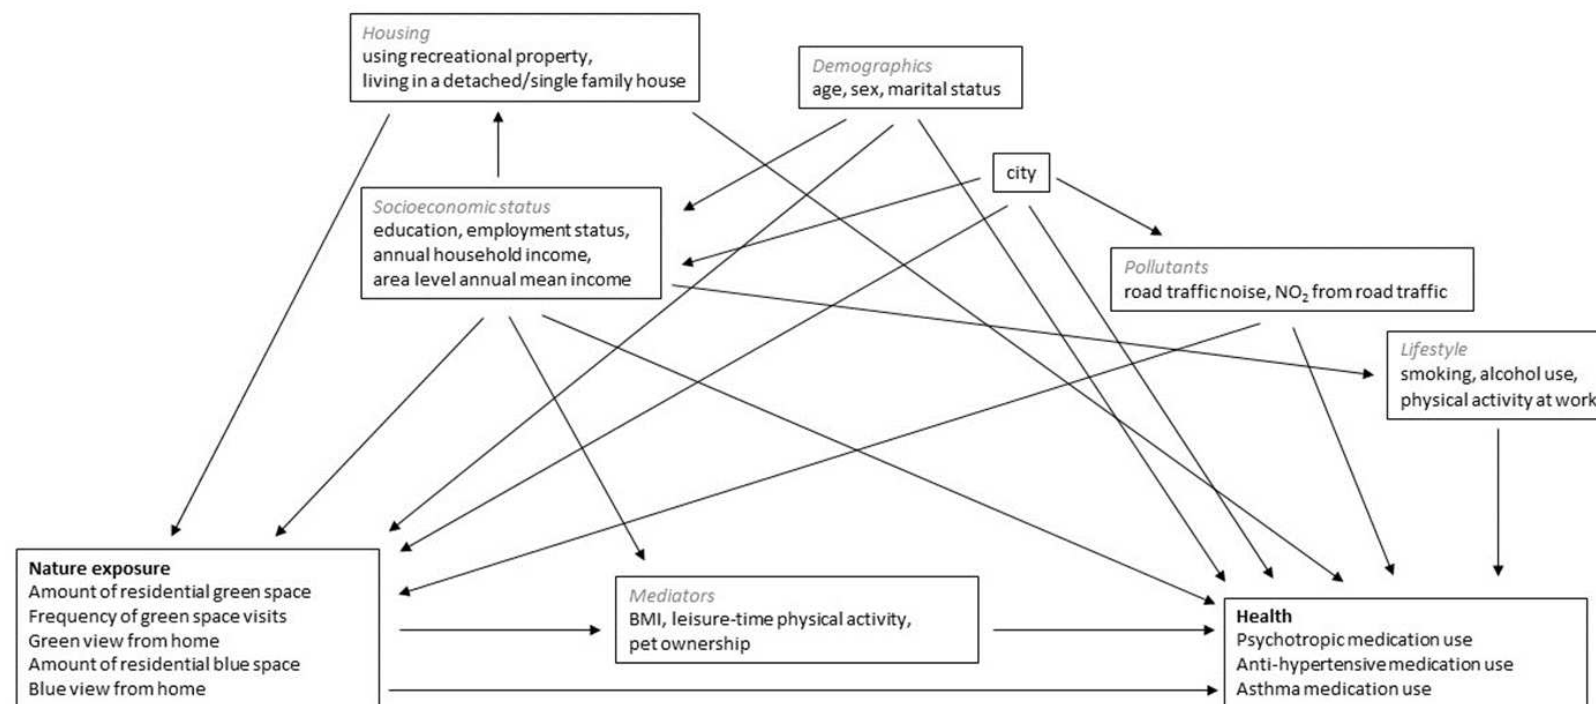

Supplemental Figure S3. Simplified directed acyclic graph for the association between nature exposure and medication use. Some variables have been grouped for readability. All potential associations between covariates have not been marked.

Supplemental Table S1. Pearson correlation coefficients between continuous exposures and SES indicators ( $n=5,987$ ).

|                                   | Amount of residential green space | Amount of residential blue space | Traffic noise | NO <sub>2</sub> from road traffic | Area level annual mean income |
|-----------------------------------|-----------------------------------|----------------------------------|---------------|-----------------------------------|-------------------------------|
| Amount of residential blue space  | -0.31                             | 1                                |               |                                   |                               |
| Road traffic noise                | -0.12                             | -0.16                            | 1             |                                   |                               |
| NO <sub>2</sub> from road traffic | -0.26                             | -0.10                            | 0.49          | 1                                 |                               |
| Area level annual mean income     | -0.08                             | 0.37                             | -0.05         | -0.08                             | 1                             |
| Area level unemployment rate      | -0.07                             | -0.17                            | -0.03         | 0.01                              | -0.72                         |

Supplemental Table S2. Continuous exposures, SES indicators, and BMI by the categories of green space visits ( $n=5,886$ ).

|                                                      | Frequency of green space visits             |     |                           |     |                           |     |                          |     |
|------------------------------------------------------|---------------------------------------------|-----|---------------------------|-----|---------------------------|-----|--------------------------|-----|
|                                                      | Never or less than once per week, $n=1,014$ |     | 1–2 times/week, $n=1,917$ |     | 3–4 times/week, $n=1,712$ |     | ≥5 times/week, $n=1,243$ |     |
|                                                      | Mean                                        | SD  | Mean                      | SD  | Mean                      | SD  | Mean                     | SD  |
| Amount of residential green space, % <sup>a</sup>    | 24                                          | 12  | 25                        | 11  | 25                        | 11  | 26                       | 11  |
| Amount of residential blue space, % <sup>a</sup>     | 4.4                                         | 9.9 | 4.6                       | 10  | 4.6                       | 9.8 | 4.7                      | 10  |
| Road traffic noise, dB <sup>b</sup>                  | 58                                          | 16  | 58                        | 15  | 58                        | 14  | 57                       | 14  |
| NO <sub>2</sub> from road traffic, µg/m <sup>3</sup> | 7.4                                         | 4.5 | 7.3                       | 4.3 | 7.3                       | 4.4 | 7.0                      | 4.1 |
| Area level annual mean income, 1,000 €               | 27                                          | 6.1 | 27                        | 5.6 | 28                        | 6.1 | 28                       | 6.5 |
| Area level unemployment rate, %                      | 6.1                                         | 1.7 | 6.0                       | 1.6 | 5.9                       | 1.6 | 5.8                      | 1.6 |
| Body mass index                                      | 27                                          | 5.7 | 26                        | 4.4 | 25                        | 4.0 | 25                       | 4.0 |

<sup>a</sup> Within a 1 km radius around the respondent's home<sup>b</sup> Average sound pressure in decibels

Supplemental Table S3. Continuous exposures and SES indicators by the categories of green view from home ( $n=5,939$ ).

|                                                             | Green view from home |     |                                                     |     |                                    |     |
|-------------------------------------------------------------|----------------------|-----|-----------------------------------------------------|-----|------------------------------------|-----|
|                                                             | No, $n=1,397$        |     | Yes, I look at it seldom or occasionally, $n=1,800$ |     | Yes, I look at it often, $n=2,742$ |     |
|                                                             | Mean                 | SD  | Mean                                                | SD  | Mean                               | SD  |
| Amount of residential green space, % <sup>a</sup>           | 22                   | 11  | 25                                                  | 11  | 26                                 | 11  |
| Amount of residential blue space, % <sup>a</sup>            | 4.4                  | 9.4 | 4.6                                                 | 10  | 4.6                                | 9.8 |
| Road traffic noise, dB <sup>b</sup>                         | 59                   | 15  | 57                                                  | 14  | 57                                 | 14  |
| NO <sub>2</sub> from road traffic, $\mu\text{g}/\text{m}^3$ | 8.3                  | 4.8 | 7.4                                                 | 4.3 | 6.7                                | 4.0 |
| Area level annual mean income, 1,000 €                      | 28                   | 6.1 | 27                                                  | 5.5 | 28                                 | 6.2 |
| Area level unemployment rate, %                             | 6.0                  | 1.6 | 6.1                                                 | 1.6 | 5.9                                | 1.6 |

<sup>a</sup> Within a 1 km radius around the respondent's home<sup>b</sup> Average sound pressure in decibelsSupplemental Table S4. Continuous exposures and SES indicators by education ( $n=5,987$ ).

|                                                             | Education                     |     |                                      |     |                                                      |     |                       |     |
|-------------------------------------------------------------|-------------------------------|-----|--------------------------------------|-----|------------------------------------------------------|-----|-----------------------|-----|
|                                                             | Comprehensive school, $n=803$ |     | Vocational or high school, $n=1,378$ |     | College or university of applied sciences, $n=1,926$ |     | University, $n=1,880$ |     |
|                                                             | Mean                          | SD  | Mean                                 | SD  | Mean                                                 | SD  | Mean                  | SD  |
| Amount of residential green space, % <sup>a</sup>           | 26                            | 10  | 25                                   | 11  | 26                                                   | 12  | 23                    | 11  |
| Amount of residential blue space, % <sup>a</sup>            | 3.2                           | 7.7 | 4.0                                  | 9.3 | 3.9                                                  | 9.0 | 6.2                   | 12  |
| Road traffic noise, dB <sup>b</sup>                         | 57                            | 14  | 58                                   | 15  | 58                                                   | 15  | 57                    | 14  |
| NO <sub>2</sub> from road traffic, $\mu\text{g}/\text{m}^3$ | 6.8                           | 4.0 | 7.0                                  | 4.2 | 7.2                                                  | 4.3 | 7.8                   | 4.5 |
| Area level annual mean income, 1,000 €                      | 26                            | 4.7 | 26                                   | 4.9 | 27                                                   | 5.6 | 29                    | 7.1 |
| Area level unemployment rate, %                             | 6.4                           | 1.6 | 6.2                                  | 1.6 | 6.0                                                  | 1.6 | 5.6                   | 1.5 |

<sup>a</sup> Within a 1 km radius around the respondent's home<sup>b</sup> Average sound pressure in decibels

Supplemental Table S5. Continuous exposures and SES indicators by annual household income (N=5,987).

|                                                      | Annual household income |     |                       |     |                       |     |                    |     |
|------------------------------------------------------|-------------------------|-----|-----------------------|-----|-----------------------|-----|--------------------|-----|
|                                                      | ≤30 000 €, n=1,462      |     | >30–50 000 €, n=1,527 |     | >50–90 000 €, n=1,899 |     | >90 000 €, n=1,099 |     |
|                                                      | Mean                    | SD  | Mean                  | SD  | Mean                  | SD  | Mean               | SD  |
| Amount of residential green space, % <sup>a</sup>    | 25                      | 11  | 25                    | 11  | 25                    | 12  | 25                 | 12  |
| Amount of residential blue space, % <sup>a</sup>     | 3.8                     | 8.3 | 4.1                   | 9.2 | 4.3                   | 9.5 | 6.5                | 13  |
| Road traffic noise, dB <sup>b</sup>                  | 58                      | 15  | 57                    | 14  | 58                    | 14  | 56                 | 14  |
| NO <sub>2</sub> from road traffic, µg/m <sup>3</sup> | 7.9                     | 4.6 | 7.3                   | 4.2 | 7.3                   | 4.3 | 6.5                | 4.0 |
| Area level annual mean income, 1,000 €               | 26                      | 5.2 | 27                    | 5.2 | 28                    | 5.9 | 30                 | 7.2 |
| Area level unemployment rate, %                      | 6.4                     | 1.6 | 6.2                   | 1.6 | 5.8                   | 1.6 | 5.3                | 1.4 |

<sup>a</sup> Within a 1 km radius around the respondent's home

<sup>b</sup> Average sound pressure in decibels

Supplemental Table S6. Categorical exposures and SES indicators and free-time physical activity by the categories of green space visits.

|                                                       | Frequency of green space visits  |            |                |            |                |            |               |            |
|-------------------------------------------------------|----------------------------------|------------|----------------|------------|----------------|------------|---------------|------------|
|                                                       | Never or less than once per week |            | 1–2 times/week |            | 3–4 times/week |            | ≥5 times/week |            |
|                                                       | <i>n</i>                         | %          | <i>n</i>       | %          | <i>n</i>       | %          | <i>n</i>      | %          |
| <b>Green view from home, <i>n</i>=5,844</b>           |                                  |            |                |            |                |            |               |            |
| No                                                    | 311                              | 31         | 473            | 25         | 373            | 22         | 228           | 18         |
| Yes, I look at it seldom or occasionally              | 359                              | 36         | 628            | 33         | 470            | 28         | 311           | 25         |
| Yes, I look at it often                               | 338                              | 34         | 795            | 42         | 858            | 50         | 700           | 57         |
| <i>Total</i>                                          | <i>1,008</i>                     | <i>100</i> | <i>1,896</i>   | <i>100</i> | <i>1,701</i>   | <i>100</i> | <i>1,239</i>  | <i>100</i> |
| <b>Education, <i>n</i>=5,886</b>                      |                                  |            |                |            |                |            |               |            |
| Comprehensive school                                  | 187                              | 18         | 227            | 12         | 198            | 11         | 157           | 13         |
| Vocational or high school                             | 268                              | 27         | 444            | 23         | 354            | 21         | 284           | 23         |
| College or university of applied sciences             | 301                              | 30         | 618            | 32         | 564            | 33         | 421           | 34         |
| University                                            | 258                              | 25         | 628            | 33         | 596            | 35         | 381           | 30         |
| <i>Total</i>                                          | <i>1,014</i>                     | <i>100</i> | <i>1,917</i>   | <i>100</i> | <i>1,712</i>   | <i>100</i> | <i>1,243</i>  | <i>100</i> |
| <b>Annual household income, <i>n</i>=5,886</b>        |                                  |            |                |            |                |            |               |            |
| ≤30 000 €                                             | 300                              | 29         | 433            | 23         | 375            | 22         | 306           | 24         |
| >30–50 000 €                                          | 260                              | 26         | 490            | 26         | 450            | 26         | 294           | 24         |
| >50–90 000 €                                          | 293                              | 29         | 623            | 32         | 544            | 32         | 423           | 34         |
| >90 000 €                                             | 161                              | 16         | 371            | 19         | 343            | 20         | 220           | 18         |
| <i>Total</i>                                          | <i>1,014</i>                     | <i>100</i> | <i>1,917</i>   | <i>100</i> | <i>1,712</i>   | <i>100</i> | <i>1,243</i>  | <i>100</i> |
| <b>Leisure-time physical activity, <i>n</i>=5,860</b> |                                  |            |                |            |                |            |               |            |
| Never or less than once per week                      | 497                              | 49         | 338            | 18         | 147            | 9          | 136           | 11         |
| 1–2 times per week                                    | 259                              | 26         | 920            | 48         | 460            | 27         | 293           | 24         |
| ≥3 times per week                                     | 249                              | 25         | 648            | 34         | 1102           | 64         | 811           | 65         |
| <i>Total</i>                                          | <i>1,005</i>                     | <i>100</i> | <i>1,906</i>   | <i>100</i> | <i>1,709</i>   | <i>100</i> | <i>1,240</i>  | <i>100</i> |

Supplemental Table S7. Categorical SES variables by the categories of green view from home.

|                                                | Green view from home |            |                                          |            |                         |            |
|------------------------------------------------|----------------------|------------|------------------------------------------|------------|-------------------------|------------|
|                                                | No                   |            | Yes, I look at it seldom or occasionally |            | Yes, I look at it often |            |
|                                                | <i>n</i>             | %          | <i>n</i>                                 | %          | <i>n</i>                | %          |
| <b>Education, <i>n</i>=5,939</b>               |                      |            |                                          |            |                         |            |
| Comprehensive school                           | 147                  | 11         | 236                                      | 13         | 408                     | 15         |
| Vocational or high school                      | 330                  | 23         | 439                                      | 24         | 594                     | 22         |
| College or university of applied sciences      | 460                  | 33         | 579                                      | 32         | 876                     | 32         |
| University                                     | 460                  | 33         | 546                                      | 31         | 864                     | 31         |
| <i>Total</i>                                   | <i>1,397</i>         | <i>100</i> | <i>1,800</i>                             | <i>100</i> | <i>2,742</i>            | <i>100</i> |
| <b>Annual household income, <i>n</i>=5,939</b> |                      |            |                                          |            |                         |            |
| ≤30 000 €                                      | 368                  | 26         | 400                                      | 22         | 671                     | 25         |
| >30–50 000 €                                   | 355                  | 26         | 477                                      | 27         | 687                     | 25         |
| >50–90 000 €                                   | 436                  | 31         | 593                                      | 33         | 857                     | 31         |
| >90 000 €                                      | 238                  | 17         | 330                                      | 18         | 527                     | 19         |
| <i>Total</i>                                   | <i>1,397</i>         | <i>100</i> | <i>1,800</i>                             | <i>100</i> | <i>2,742</i>            | <i>100</i> |



Supplemental Table S8. Stratified analysis by SES indicators (performed when the *P*-value for the interaction term was <0.1).

|                                                        | Model 3 <sup>a</sup>                                                      |           | Model 3 <sup>a</sup>                                                      |           | Model 3 <sup>a</sup>                                                      |           |
|--------------------------------------------------------|---------------------------------------------------------------------------|-----------|---------------------------------------------------------------------------|-----------|---------------------------------------------------------------------------|-----------|
|                                                        | OR                                                                        | 95% CI    | OR                                                                        | 95% CI    | OR                                                                        | 95% CI    |
| <b>PSYCHOTROPIC MEDICATION USE</b>                     |                                                                           |           |                                                                           |           |                                                                           |           |
|                                                        | Annual household income, ≤30,000 €<br><i>n</i> =1,414                     |           | Annual household income, >30–90,000 €<br><i>n</i> =3,377                  |           | Annual household income, >90,000 €<br><i>n</i> =1,095                     |           |
| <b>Frequency of green space visits</b>                 |                                                                           |           |                                                                           |           |                                                                           |           |
| Never/less than once per week                          | ref                                                                       | ref       | ref                                                                       |           | ref                                                                       | ref       |
| 1–2 times/week                                         | 0.70                                                                      | 0.50–0.97 | 0.73                                                                      | 0.56–0.96 | 1.51                                                                      | 0.89–2.56 |
| 3–4 times/week                                         | 0.52                                                                      | 0.36–0.73 | 0.72                                                                      | 0.55–0.95 | 1.00                                                                      | 0.57–1.74 |
| ≥5 times/week                                          | 0.60                                                                      | 0.41–0.87 | 0.85                                                                      | 0.63–1.13 | 1.18                                                                      | 0.64–1.15 |
|                                                        | Comprehensive/vocational/high school<br><i>n</i> =2,181                   |           | College/polytechnic<br><i>n</i> =1,926                                    |           | Academic training<br><i>n</i> =1,880                                      |           |
| <b>Amount of residential blue space<sup>b</sup></b>    |                                                                           |           |                                                                           |           |                                                                           |           |
| 0%                                                     | ref                                                                       | ref       | ref                                                                       |           | ref                                                                       | ref       |
| >0–10%                                                 | 1.33                                                                      | 1.05–1.68 | 0.79                                                                      | 0.60–1.03 | 1.26                                                                      | 0.95–1.67 |
| >10%                                                   | 1.06                                                                      | 0.76–1.49 | 1.01                                                                      | 0.70–1.46 | 1.07                                                                      | 0.77–1.50 |
|                                                        | Area level unemployment rate, 1 <sup>st</sup> tertile<br><i>n</i> =2,054  |           | Area level unemployment rate, 2 <sup>nd</sup> tertile<br><i>n</i> =1,902  |           | Area level unemployment rate, 3 <sup>rd</sup> tertile<br><i>n</i> =2,031  |           |
| <b>Amount of residential of blue space<sup>b</sup></b> |                                                                           |           |                                                                           |           |                                                                           |           |
| 0%                                                     | ref                                                                       | ref       | ref                                                                       |           | ref                                                                       | ref       |
| >0–10%                                                 | 1.03                                                                      | 0.79–1.36 | 1.12                                                                      | 0.86–1.46 | 1.11                                                                      | 0.87–1.42 |
| >10%                                                   | 1.28                                                                      | 0.96–1.71 | 1.04                                                                      | 0.70–1.54 | 0.69                                                                      | 0.47–1.02 |
| <b>ANTIHYPERTENSIVE MEDICATION USE</b>                 |                                                                           |           |                                                                           |           |                                                                           |           |
|                                                        | Area level annual mean income, 1 <sup>st</sup> tertile<br><i>n</i> =1,940 |           | Area level annual mean income, 2 <sup>nd</sup> tertile<br><i>n</i> =2,049 |           | Area level annual mean income, 3 <sup>rd</sup> tertile<br><i>n</i> =1,993 |           |
| <b>Green view from home</b>                            |                                                                           |           |                                                                           |           |                                                                           |           |
| No                                                     | ref                                                                       | ref       | ref                                                                       |           | ref                                                                       | ref       |
| Yes, I look at it seldom/occasionally                  | 1.47                                                                      | 1.05–2.09 | 1.22                                                                      | 0.88–1.68 | 0.72                                                                      | 0.50–1.02 |
| Yes, I look at it often                                | 1.08                                                                      | 0.78–1.50 | 0.96                                                                      | 0.71–1.30 | 0.88                                                                      | 0.64–1.20 |

|                                                      | Area level unemployment rate, 1 <sup>st</sup> tertile<br><i>n</i> =2,052  |           | Area level unemployment rate, 2 <sup>nd</sup> tertile<br><i>n</i> =1,902  |           | Area level unemployment rate, 3 <sup>rd</sup> tertile<br><i>n</i> =2,028  |           |
|------------------------------------------------------|---------------------------------------------------------------------------|-----------|---------------------------------------------------------------------------|-----------|---------------------------------------------------------------------------|-----------|
| <b>Green view from home</b>                          |                                                                           |           |                                                                           |           |                                                                           |           |
| No                                                   | ref                                                                       | ref       | ref                                                                       | ref       | ref                                                                       | ref       |
| Yes, I look at it seldom/occasionally                | 0.77                                                                      | 0.54–1.10 | 1.15                                                                      | 0.81–1.62 | 1.37                                                                      | 0.99–1.89 |
| Yes, I look at it often                              | 0.87                                                                      | 0.64–1.19 | 1.03                                                                      | 0.75–1.43 | 0.96                                                                      | 0.71–1.30 |
|                                                      | Area level annual mean income, 1 <sup>st</sup> tertile<br><i>n</i> =1,959 |           | Area level annual mean income, 2 <sup>nd</sup> tertile<br><i>n</i> =2,064 |           | Area level annual mean income, 3 <sup>rd</sup> tertile<br><i>n</i> =2,008 |           |
| <b>Amount of residential green space<sup>b</sup></b> | 1.01                                                                      | 1.00–1.02 | 0.99                                                                      | 0.98–1.00 | 1.00                                                                      | 0.99–1.01 |
| <b>ASTHMA MEDICATION USE</b>                         |                                                                           |           |                                                                           |           |                                                                           |           |
|                                                      | Area level unemployment rate, 1 <sup>st</sup> tertile<br><i>n</i> =2,056  |           | Area level unemployment rate, 2 <sup>nd</sup> tertile<br><i>n</i> =1,896  |           | Area level unemployment rate, 3 <sup>rd</sup> tertile<br><i>n</i> =2,031  |           |
| <b>Amount of residential blue space</b>              |                                                                           |           |                                                                           |           |                                                                           |           |
| 0%                                                   | ref                                                                       | ref       | ref                                                                       |           | ref                                                                       | ref       |
| >0–10%                                               | 0.77                                                                      | 0.54–1.10 | 1.55                                                                      | 1.13–2.11 | 0.88                                                                      | 0.66–1.19 |
| >10%                                                 | 0.89                                                                      | 0.61–1.30 | 1.17                                                                      | 0.73–1.89 | 0.89                                                                      | 0.58–1.38 |

<sup>a</sup> Model 3 (main) adjusted for age, sex, marital status, education, employment status, annual household income, smoking, alcohol use, physical activity at work, using recreational property during warm season, area level annual mean income, road traffic noise, and NO<sub>2</sub> from car traffic.

<sup>b</sup> Within a 1 km radius around the respondent's home

Supplemental Table S9. The effect of BMI and leisure-time physical activity to the observed associations.

|                                        | Model 3 <sup>a</sup> |                 | Model 3 <sup>a</sup> + BMI |                 | Model 3 <sup>a</sup> + leisure-time physical activity |                 |
|----------------------------------------|----------------------|-----------------|----------------------------|-----------------|-------------------------------------------------------|-----------------|
|                                        | OR                   | 95% CI          | OR                         | 95% CI          | OR                                                    | 95% CI          |
| <b>PSYCHOTROPIC MEDICATION USE</b>     |                      |                 |                            |                 |                                                       |                 |
| <b>Frequency of green space visits</b> |                      | <i>n</i> =5,886 |                            | <i>n</i> =5,800 |                                                       | <i>n</i> =5,860 |
| Never/less than once per week          | ref                  | ref             | ref                        | ref             | ref                                                   | ref             |
| 1–2 times/week                         | 0.80                 | 0.66–0.97       | 0.81                       | 0.66–0.98       | 0.84                                                  | 0.69–1.03       |
| 3–4 times/week                         | 0.67                 | 0.55–0.82       | 0.70                       | 0.57–0.85       | 0.71                                                  | 0.57–0.87       |
| ≥5 times/week                          | 0.78                 | 0.63–0.96       | 0.80                       | 0.65–0.99       | 0.81                                                  | 0.65–1.01       |
| <b>ANTIHYPERTENSIVE MEDICATION USE</b> |                      |                 |                            |                 |                                                       |                 |
| <b>Frequency of green space visits</b> |                      | <i>n</i> =5,928 |                            | <i>n</i> =5,840 |                                                       | <i>n</i> =5,900 |
| Never/less than once per week          | ref                  | ref             | ref                        | ref             | ref                                                   | ref             |
| 1–2 times/week                         | 0.84                 | 0.69–1.02       | 0.98                       | 0.80–1.21       | 0.84                                                  | 0.69–1.03       |
| 3–4 times/week                         | 0.64                 | 0.52–0.78       | 0.82                       | 0.67–1.02       | 0.70                                                  | 0.57–0.87       |
| ≥5 times/week                          | 0.59                 | 0.48–0.74       | 0.80                       | 0.64–1.01       | 0.65                                                  | 0.52–0.82       |
| <b>ASTHMA MEDICATION USE</b>           |                      |                 |                            |                 |                                                       |                 |
| <b>Frequency of green space visits</b> |                      | <i>n</i> =5,983 |                            | <i>n</i> =5,796 |                                                       | <i>n</i> =5,857 |
| Never/less than once per week          | ref                  | ref             | ref                        | ref             | ref                                                   | ref             |
| 1–2 times/week                         | 0.85                 | 0.68–1.07       | 0.92                       | 0.73–1.17       | 0.85                                                  | 0.67–1.09       |
| 3–4 times/week                         | 0.74                 | 0.58–0.94       | 0.83                       | 0.65–1.06       | 0.76                                                  | 0.58–0.98       |
| ≥5 times/week                          | 0.76                 | 0.59–0.99       | 0.88                       | 0.67–1.15       | 0.78                                                  | 0.59–1.03       |

<sup>a</sup> Model 3 (main) adjusted for age, sex, marital status, education, employment status, annual household income, smoking, alcohol use, physical activity at work, using recreational property during warm season, area level annual mean income, road traffic noise, and NO<sub>2</sub> from road traffic.
